# Supplementary material for: Enhanced Extracellular Transfer of HLA-DQ Activates CD3+ Lymphocytes towards Compromised Treg Induction in Celiac Disease
Source: MDPI journal article supplement (doi:10.3390/ijms23116102), 2022-05-29
Supplement: s1 [file s1]

|                                                                                                                                                            |              |
|------------------------------------------------------------------------------------------------------------------------------------------------------------|--------------|
| Celiac Disease                                                                                                                                             | CeD          |
| HLA Class II                                                                                                                                               | HLA-II       |
| Major Histocompatibility Complex                                                                                                                           | MHC          |
| Monocyte Derived Dendritic Cells                                                                                                                           | MoDCs        |
| Antigen Presenting Cell                                                                                                                                    | APC          |
| T-Cell Receptor                                                                                                                                            | TCR          |
| T-regulatory Cells                                                                                                                                         | Tregs        |
| Conditioned Growth Media                                                                                                                                   | CGM          |
| Healthy Controls                                                                                                                                           | CTL          |
| Lipopolysaccharide                                                                                                                                         | LPS          |
| Exosome Localization Motif                                                                                                                                 | ELM          |
| Complete media with inclusion of human granulocyte-macrophage colony-stimulating factor and human interleukin - 4                                          | CMI          |
| Complete media with inclusion of human granulocyte-macrophage colony-stimulating factor and human interleukin - 4 and exosome depleted foetal bovine serum | CMII         |
| Curved Flow Cytometric Histograms                                                                                                                          | CFCHs        |
| Mean Fluorescence Intensity                                                                                                                                | MFI          |
| Non-conditioned media                                                                                                                                      | NCM          |
| Non-conditioned media with LPS stimulant                                                                                                                   | NCS          |
| Leukocyte Function-associated Antigen-1                                                                                                                    | LFA-1        |
| Tissue transglutaminase 2                                                                                                                                  | tTGA         |
| Gluten-free diet                                                                                                                                           | GFD          |
| Peripheral Blood Mononuclear Cells                                                                                                                         | PBMCs        |
| Room Temperature                                                                                                                                           | RT           |
| Complete Medium: RPMI medium, FBS, antibiotic – antimycotic solution                                                                                       | CM           |
| Granulocyte-Macrophage Colony-Stimulating Factor                                                                                                           | GM-CSF       |
| Immuno-Polymorphism Database – International Immunogenetics Project – Human Leukocyte Antigen                                                              | IPD-IMGT/HLA |
| Foetal Bovine Serum                                                                                                                                        | FBS          |
| Growth media                                                                                                                                               | GM           |

**Supplementary Table S1:** List of abbreviations used throughout.

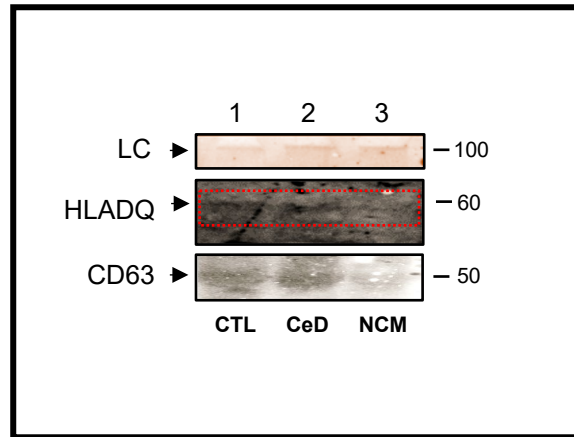

**Supplementary Figure S1 (supporting Figure 3):** Representative Western blots showing that HLADQ is expressed on exosomes. These were extracted from conditioned media exposed to monocyte derived dendritic cells of healthy control individuals (CTL), celiac disease patients (CeD) or non-conditioned media (NCM). HLADQ appears as a heterodimer given the molecular weight of approx.60 Kd. The presence of exosomes is indicated by CD63 staining. Nytran membrane was Ponceau S stained with a non-specific band representing a loading control in the secreted samples (LC).
